# Supplementary material for: The Reality of Pervasive Transcription
Source: PLOS journal article supplement (doi:10.1371/journal.pbio.1000625), 2011-07-12
Supplement: S2 (10.1371/journal.pbio.1000625.s002) [file journal.pbio.1000625.s002]

**Figure S1**

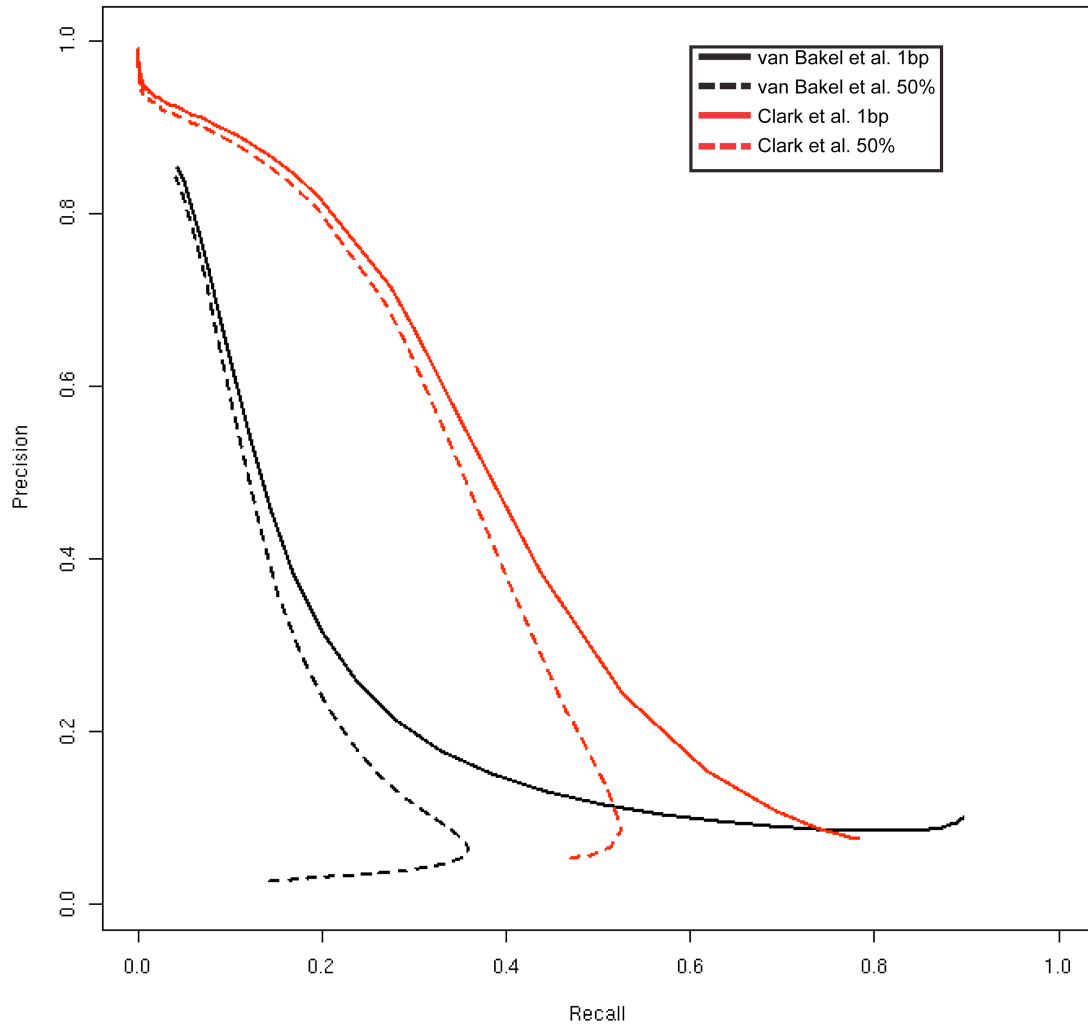

Figure S1: Comparison of the PR curve transfrags from Clark *et al.* (ENCODE) and van Bakel *et al.* data [1]. The dramatic difference in shape holds even for strict overlap criteria, requiring that any transfrag overlaps an exon with at least 50% of its length to prevent random overlaps. At very low probe thresholds (1 bp overlap), transfrags increase in length resulting in fewer positive calls under the 50% overlap rule.

1. van Bakel H, Nislow C, Blencowe BJ, Hughes TR (2010) Most "dark matter" transcripts are associated with known genes. PLoS Biol 8: e1000371.
