# Supplementary material for: The Reality of Pervasive Transcription
Source: PLOS journal article supplement (doi:10.1371/journal.pbio.1000625), 2011-07-12
Supplement: S4 (10.1371/journal.pbio.1000625.s004) [file journal.pbio.1000625.s004]

Figure S3

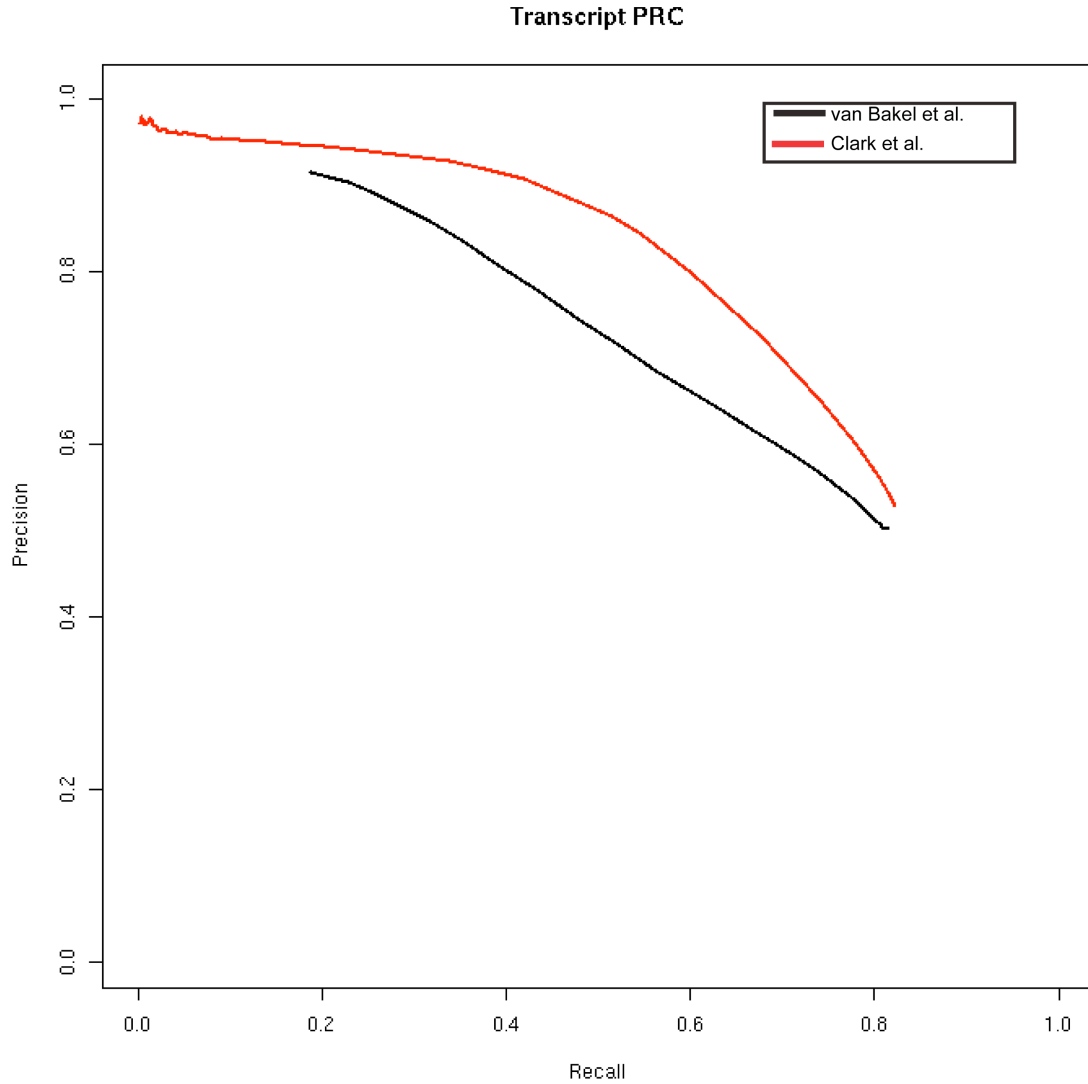

Figure S3: PR curve for transcripts. If any transfrag that overlaps any part of a transcript (as opposed to only the exons) is scored positive, the van Bakel *et al.* dataset [1] shows much higher precision, indicating that many of their negative calls (transfrags detected outside of exons) from Figure 1 result from transfrags in introns. A similar analysis for the Clark *et al.* data is shown for comparison.

1. van Bakel H, Nislow C, Blencowe BJ, Hughes TR (2010) Most "dark matter" transcripts are associated with known genes. PLoS Biol 8: e1000371.
