# Supplementary material for: The Reality of Pervasive Transcription
Source: PLOS journal article supplement (doi:10.1371/journal.pbio.1000625), 2011-07-12
Supplement: S5 (10.1371/journal.pbio.1000625.s005) [file journal.pbio.1000625.s005]

Figure S4

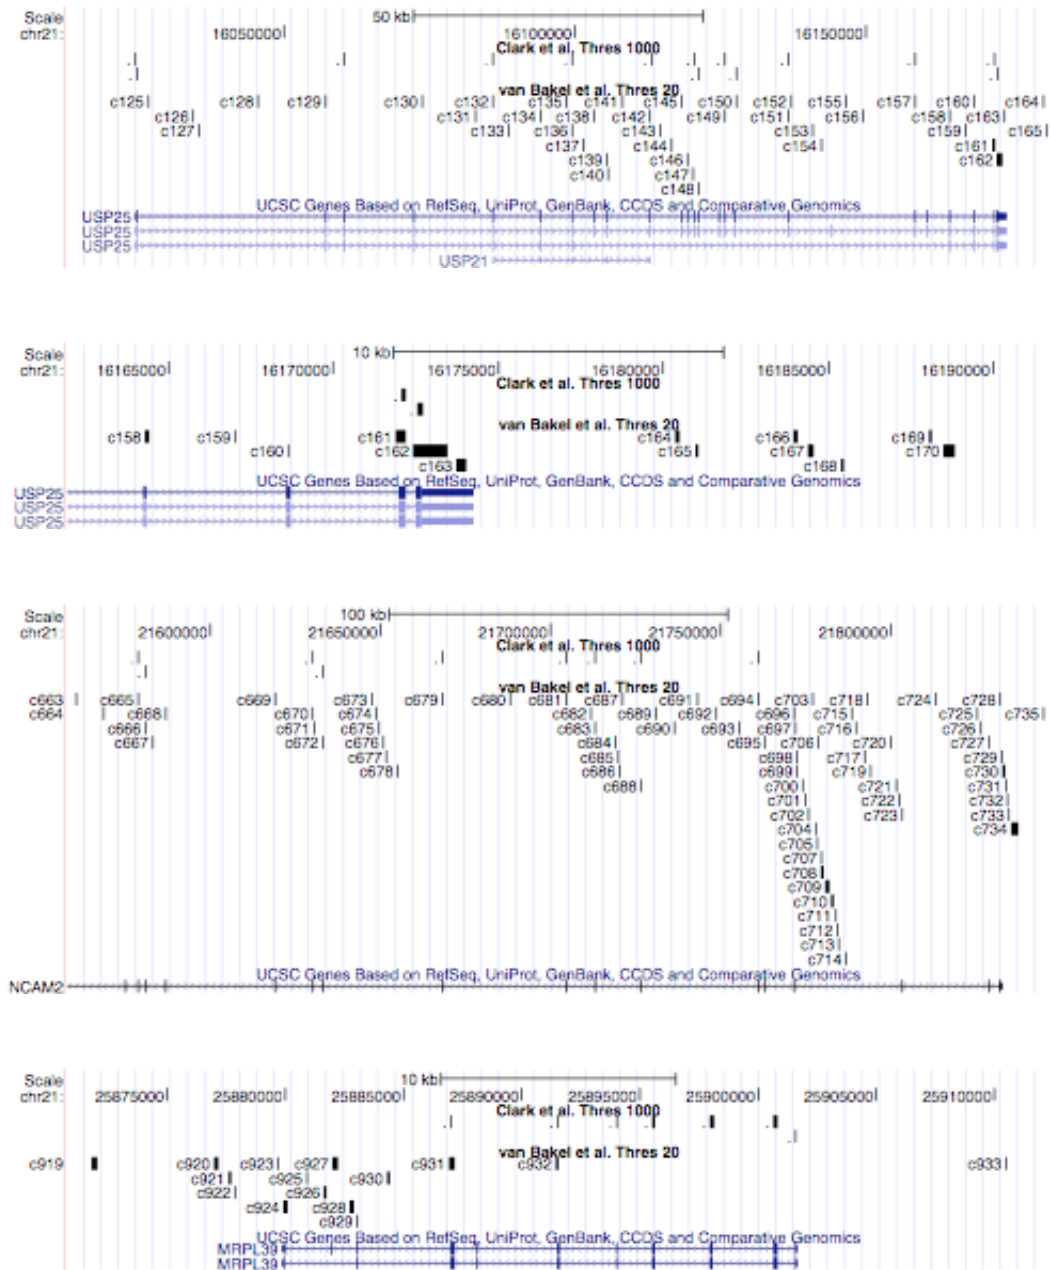

Figure S4: Genome browser screenshots showing annotation and transfrags from the van Bakel *et al.* [1] and the Clark *et al.* (ENCODE) tiling arrays using a threshold that gives similar recall values for both. The van Bakel *et al.* arrays show many more scattered transfrags.

1. van Bakel H, Nislow C, Blencowe BJ, Hughes TR (2010) Most "dark matter" transcripts are associated with known genes. *PLoS Biol* 8: e1000371.
