# Supplementary material for: The Reality of Pervasive Transcription
Source: PLOS journal article supplement (doi:10.1371/journal.pbio.1000625), 2011-07-12
Supplement: S6 (10.1371/journal.pbio.1000625.s006) [file journal.pbio.1000625.s006]

**Figure S5**

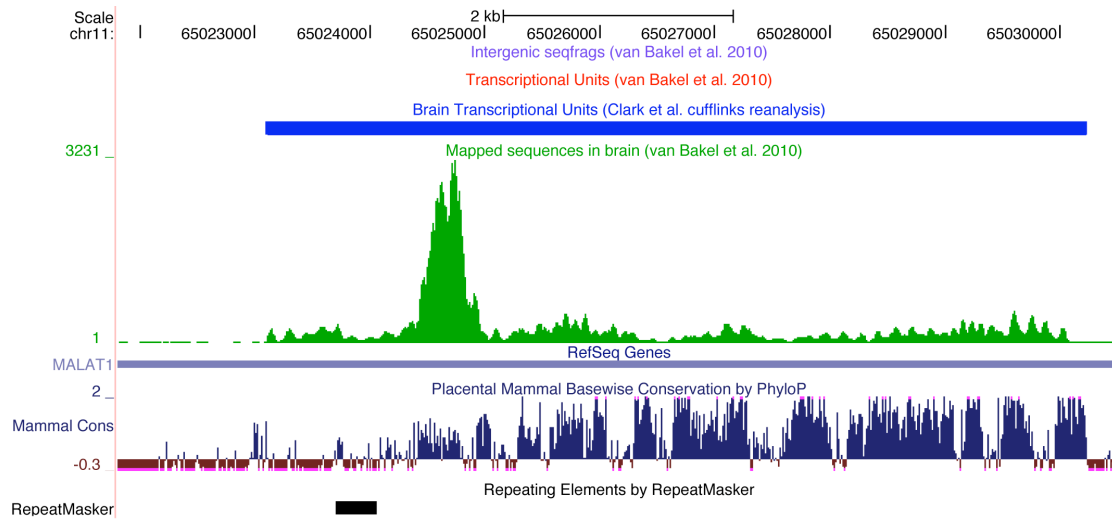

Figure S5: Known single exon transcripts are missing from van Bakel *et al.* TUs. Sequence reads (green) provide good coverage of *Malat1* gene but are not found in the van Bakel *et al.* TUs (red). Reanalysis of sequence reads without specifying the presence of a splice junction in known genes identifies the relatively highly expressed *Malat1* transcript [1] as a TU (dark blue).

1. Ji P, Diederichs S, Wang W, Boing S, Metzger R, et al. (2003) MALAT-1, a novel noncoding RNA, and thymosin beta4 predict metastasis and survival in early-stage non-small cell lung cancer. *Oncogene* 22: 8031-8041.
